# Supplementary material for: Neuropsychiatric symptoms in at-risk groups for AD dementia and their association with worry and AD biomarkers—results from the DELCODE study
Source: PubMed Central journal article supplement (PMC7566134; doi:10.1186/s13195-020-00701-7), 2020-10-16
Supplement: 13195_2020_701_MOESM1_ESM.pdf [file 13195_2020_701_MOESM1_ESM.pdf]

**Table S1. A) Regression Coefficients and Odds Ratios (95% Confidence Intervals) from binary logistic regression to predict a GDS score  $\geq 1$** 

| Predictors           | Whole sample<br>(n = 296)     | Cognitively healthy<br>(CO+SCD+REL)<br>(n = 190) | Cognitively healthy worrier<br>(n = 100) | Cognitively healthy non-worrier<br>(n = 88) |
|----------------------|-------------------------------|--------------------------------------------------|------------------------------------------|---------------------------------------------|
|                      | OR (95% CI), p-value          | OR (95% CI), p-value                             | OR (95% CI), p-value                     | OR (95% CI), p-value                        |
| Age                  | 1.041 (0.991 – 1.092), 0.107  | 1.039 (0.978 – 1.103), 0.214                     | 1.013 (0.927 – 1.108), 0.772             | 1.072 (0.976 – 1.178), 0.146                |
| Sex                  | 0.801 (0.465 – 1.377), 0.422  | 0.944 (0.476 – 1.876), 0.870                     | 0.870 (0.295 – 2.563), 0.800             | 0.978 (0.361 – 2.650), 0.965                |
| Education            | 0.987 (0.899 – 1.083), 0.775  | 0.973 (0.868 – 1.091), 0.639                     | 0.949 (0.804 – 1.121), 0.542             | 0.994 (0.825 – 1.197), 0.946                |
| MEM                  | 0.718 (0.483 – 0.067), 0.101  | 0.565 (0.250 – 1.279), 0.171                     | 0.521 (0.149 – 1.825), 0.308             | 0.579 (0.167 – 2.007), 0.386                |
| A $\beta$ 42 (pg/ml) | 0.999 (0.998 – 1.000), 0.173  | 0.999 (0.998 – 1.000), 0.049*                    | 0.999 (0.997 – 1.000), 0.152             | 0.999 (0.998 – 1.001), 0.414                |
| t-tau (pg/ml)        | 0.997 (0.995 – 1.000), 0.045* | 0.996 (0.993 – 1.000), 0.064                     | 0.995 (0.990 – 1.001), 0.083             | 0.997 (0.991 – 1.003), 0.379                |
| p-tau (pg/ml)        | 1.023 (1.000 – 1.046), 0.047* | 1.030 (0.977 – 1.064), 0.077                     | 1.042 (0.992 – 1.094), 0.099             | 1.020 (0.968 – 1.075), 0.448                |

Note. \*  $p < .05$ . A $\beta$ 42 beta-amyloid 42; CO healthy controls; CI Confidence Interval; MEM Memory factor score; OR Odds ratio; p-tau phospho-tau; REL first degree relatives of AD patients; SCD subjective cognitive decline; t-tau total tau

**Table S1. B) Regression Coefficients and Odds Ratios (95% Confidence Intervals) from binary logistic regression to predict a GDS score  $\geq 2$** 

| Predictors           | Whole sample<br>(n = 296)     | Cognitively healthy (CO+SCD+REL)<br>(n = 190) | Cognitively healthy worrier<br>(n = 100) | Cognitively healthy non-worrier<br>(n = 88) |
|----------------------|-------------------------------|-----------------------------------------------|------------------------------------------|---------------------------------------------|
|                      | OR (95% CI), p-value          | OR (95% CI), p-value                          | OR (95% CI), p-value                     | OR (95% CI), p-value                        |
| Age                  | 1.022 (0.977 – 1.069), 0.351  | 1.033 (0.971 – 1.099), 0.303                  | 1.056 (0.973 – 1.146), 0.193             | 1.033 (0.905 – 1.179), 0.632                |
| Sex                  | 0.795 (0.476 – 1.328), 0.380  | 0.600 (0.294 – 1.228), 0.162                  | 0.489 (0.190 – 1.263), 0.140             | 0.611 (0.142 – 2.630), 0.508                |
| Education            | 1.053 (0.965 – 1.150), 0.242  | 1.065 (0.947 – 1.199), 0.293                  | 0.989 (0.853 – 1.146), 0.883             | 1.205 (0.922 – 1.576), 0.172                |
| MEM                  | 0.733 (0.517 – 1.041), 0.083  | 0.659 (0.308 – 1.412), 0.284                  | 0.902 (0.3622 – 2.252), 0.826            | 0.233 (0.039 – 2.388), 0.110                |
| A $\beta$ 42 (pg/ml) | 0.999 (0.998 – 1.000), 0.169  | 0.999 (0.998 – 1.000), 0.077                  | 0.999 (0.997 – 1.000), 0.083             | 1.000 (0.998 – 1.003), 0.670                |
| t-tau (pg/ml)        | 0.998 (0.995 – 1.000), 0.062  | 0.996 (0.992 – 1.000), 0.050                  | 0.995 (0.989 – 1.000), 0.039*            | 0.996 (0.988 – 1.005), 0.400                |
| p-tau (pg/ml)        | 1.022 (1.001 – 1.043), 0.036* | 1.031 (0.998 – 1.066), 0.068                  | 1.041 (0.999 – 1.084), 0.054             | 1.025 (0.951 – 1.104), 0.518                |

Note. \*  $p < .05$ . A $\beta$ 42 beta-amyloid 42; CO healthy controls; CI Confidence Interval; MEM Memory factor score; OR Odds ratio; p-tau phospho-tau; REL first degree relatives of AD patients; SCD subjective cognitive decline; t-tau total tau

**Table S2. A) Regression Coefficients and Odds Ratios (95% Confidence Intervals) from binary logistic regression to predict a GAI-SF score  $\geq 1$** 

| Predictors           | Whole sample<br>(n = 302)    | Cognitively healthy<br>(CO+SCD+REL)<br>(n = 194) | Cognitively healthy worrier<br>(n = 104) | Cognitively healthy non-worrier<br>(n = 88) |
|----------------------|------------------------------|--------------------------------------------------|------------------------------------------|---------------------------------------------|
|                      | OR (95% CI), p-value         | OR (95% CI), p-value                             | OR (95% CI), p-value                     | OR (95% CI), p-value                        |
| Age                  | 0.988 (0.947 – 1.032), 0.593 | 1.000 (0.946 – 1.057), 0.992                     | 0.962 (0.885 – 1.045), 0.361             | 1.042 (0.948 – 1.145), 0.393                |
| Sex                  | 1.230 (0.757 – 2.000), 0.403 | 1.468 (0.769 – 2.801), 0.244                     | 0.987 (0.381 – 2.558), 0.979             | 2.210 (0.788 – 6.193), 0.132                |
| Education            | 1.002 (0.922 – 1.088), 0.967 | 1.006 (0.905 – 1.119), 0.905                     | 0.935 (0.807 – 1.084), 0.373             | 1.123 (0.928 – 1.360), 0.232                |
| MEM                  | 0.976 (0.699 – 1.364), 0.888 | 0.727 (0.353 – 1.495), 0.386                     | 0.741 (0.284 – 1.933), 0.540             | 0.892 (0.254 – 3.134), 0.858                |
| A $\beta$ 42 (pg/ml) | 1.000 (0.999 – 1.001), 0.748 | 1.000 (0.999 – 1.001), 0.969                     | 1.001 (1.000 – 1.003), 0.072             | 0.999 (0.997 – 1.001), 0.261                |
| t-tau (pg/ml)        | 0.999 (0.996 – 1.001), 0.256 | 0.999 (0.996 – 1.003), 0.594                     | 1.001 (0.996 – 1.006), 0.622             | 0.997 (0.990 – 1.003), 0.259                |
| p-tau (pg/ml)        | 1.015 (0.995 – 1.035), 0.140 | 1.003 (0.974 – 1.033), 0.833                     | 0.986 (0.948 – 1.026), 0.495             | 1.024 (0.971 – 1.079), 0.386                |

Note. A $\beta$ 42 beta-amyloid 42; CO healthy controls; CI Confidence Interval; MEM Memory factor score; OR Odds ratio; p-tau phospho-tau; REL first degree relatives of AD patients; SCD subjective cognitive decline; t-tau total tau

**Table S2. B) Regression Coefficients and Odds Ratios (95% Confidence Intervals) from binary logistic regression to predict a GAI-SF score  $\geq 2$** 

| Predictors           | Whole sample<br>(n = 302)    | Cognitively healthy (CO+SCD+REL)<br>(n = 194) | Cognitively healthy worrier<br>(n = 104) | Cognitively healthy non-worrier<br>(n = 88) |
|----------------------|------------------------------|-----------------------------------------------|------------------------------------------|---------------------------------------------|
|                      | OR (95% CI), p-value         | OR (95% CI), p-value                          | OR (95% CI), p-value                     | OR (95% CI), p-value                        |
| Age                  | 0.973 (0.927 – 1.021), 0.264 | 0.958 (0.897 – 1.023), 0.200                  | 0.941 (0.866 – 1.022), 0.147             | 0.934 (0.783 – 1.115), 0.452                |
| Sex                  | 1.513 (0.872 – 2.625), 0.141 | 1.730 (0.820 – 3.650), 0.150                  | 1.112 (0.431 – 2.870), 0.827             | 6.204 (0.772 – 49.876), 0.086               |
| Education            | 1.014 (0.923 – 1.115), 0.772 | 1.029 (0.909 – 1.165), 0.650                  | 0.992 (0.854 – 1.153), 0.921             | 1.095 (0.806 – 1.488), 0.560                |
| MEM                  | 1.162 (0.794 – 1.701), 0.439 | 0.625 (0.283 – 1.379), 0.245                  | 0.695 (0.279 – 1.727), 0.433             | 0.504 (0.045 – 5.621), 0.578                |
| A $\beta$ 42 (pg/ml) | 1.000 (0.999 – 1.001), 0.569 | 1.000 (0.999 – 1.001), 0.836                  | 1.002 (1.000 – 1.003), 0.022*            | 0.996 (0.993 – 1.000), 0.060                |
| t-tau (pg/ml)        | 1.000 (0.997 – 1.002), 0.899 | 0.999 (0.995 – 1.004), 0.796                  | 1.001 (0.996 – 1.006), 0.707             | 1.000 (0.989 – 1.011), 0.979                |
| p-tau (pg/ml)        | 1.011 (0.990 – 1.032), 0.316 | 1.001 (0.967 – 1.037), 0.940                  | 0.996 (0.957 – 1.036), 0.832             | 0.984 (0.892 – 1.085), 0.747                |

Note. \*  $p < .05$ . A $\beta$ 42 beta-amyloid 42; CO healthy controls; CI Confidence Interval; MEM Memory factor score; OR Odds ratio; p-tau phospho-tau; REL first degree relatives of AD patients; SCD subjective cognitive decline; t-tau total tau

**Table S3.** Regression Coefficients and Odds Ratios (95% Confidence Intervals) from binary logistic regression to predict the presence of agitation, depression, anxiety, apathy, irritability and sleep disturbances on the NPI-Q.

| Predictors        | Whole sample<br>(n = 296) | Cognitively healthy<br>(CO+SCD+REL)<br>(n = 190) | Cognitively healthy worrier<br>(n = 100) | Cognitively healthy non-worrier<br>(n = 88) |                              |
|-------------------|---------------------------|--------------------------------------------------|------------------------------------------|---------------------------------------------|------------------------------|
|                   | OR (95% CI), p-value      | OR (95% CI), p-value                             | OR (95% CI), p-value                     | OR (95% CI), p-value                        |                              |
| <b>Agitation</b>  | Age                       | 1.047 (0.991 – 1.106), 0.102                     | 1.105 (1.011 – 1.208), 0.028*            | 1.153 (1.022 – 1.301), 0.021*               | 1.114 (0.917 – 1.353), 0.278 |
|                   | Sex                       | 0.445 (0.232 – 0.856), 0.015**                   | 0.346 (0.113 – 1.057), 0.063             | 0.361 (0.092 – 1.422), 0.145                | 0.122 (0.010 – 1.520), 0.102 |
|                   | Education                 | 0.968 (0.871 – 1.077), 0.554                     | 0.987 (0.838 – 1.162), 0.876             | 1.021 (0.839 – 1.242), 0.836                | 0.885 (0.610 – 1.285), 0.521 |
|                   | MEM                       | 1.054 (0.702 – 1.582), 0.800                     | 0.723(0.256 – 2.042), 0.541              | 1.266 (0.337 – 4.750), 0.727                | 0.133 (0.007 – 2.400), 0.172 |
|                   | A $\beta$ 42 (pg/ml)      | 0.998 (0.997 – 1.000), 0.009**                   | 0.999 (0.997 – 1.000), 0.085             | 0.997 (0.995 – 1.000), 0.020*               | 1.002 (0.998 – 1.006), 0.275 |
|                   | t-tau (pg/ml)             | 1.000 (0.997 – 1.003), 0.995                     | 0.999 (0.993 – 1.004), 0.632             | 0.996 (0.989 – 1.002), 0.198                | 1.009 (0.996 – 1.023), 0.167 |
|                   | p-tau (pg/ml)             | 1.010 (0.988 – 1.033), 0.372                     | 1.010 (0.966 – 1.055), 0.674             | 1.042( 0.990 – 1.096), 0.112                | 0.881 (0.767 – 1.012), 0.073 |
| <b>Depression</b> | Age                       | 1.013 (0.958 – 1.070), 0.656                     | 1.021 (0.933 – 1.116), 0.654             | 0.973 (0.874 – 1.084), 0.623                |                              |
|                   | Sex                       | 1.332 (0.700 – 2.533), 0.382                     | 0.805(0.287 – 2.256), 0.680              | 0.974 (0.296 – 3.207), 0.966                |                              |
|                   | Education                 | 1.019 (0.914 – 1.135), 0.739                     | 0.965 (0.816 – 1.141), 0.675             | 0.989 (0.818 – 1.195), 0.905                |                              |
|                   | MEM                       | 0.718 (0.477 – 1.080), 0.111                     | 0.762 (0.282 – 2.057), 0.592             | 0.951(0.326 – 2.777), 0.927                 | < 5 cases                    |
|                   | A $\beta$ 42 (pg/ml)      | 0.998 (0.997 – 0.999), 0.004**                   | 0.998 (0.996 – 1.000), 0.044*            | 0.998 (0.996 – 1.000), 0.132                |                              |
|                   | t-tau (pg/ml)             | 0.999 (0.997 – 1.002), 0.700                     | 1.001 (0.995 – 1.006), 0.849             | 1.002 (0.996 – 1.008), 0.582                |                              |
|                   | p-tau (pg/ml)             | 1.003 (0.979 – 1.028), 0.785                     | 0.986 (0.938 – 1.036), 0.568             | 0.981 (0.930 – 1.035), 0.488                |                              |
| <b>Anxiety</b>    | Age                       | 0.995 (0.935 – 1.060), 0.885                     | 1.082 (0.972 – 1.205), 0.151             | 1.075 (0.937 – 1.234), 0.304                |                              |
|                   | Sex                       | 0.763 (0.372 – 1.562), 0.459                     | 0.741 (0.210 – 2.613), 0.641             | 0.584 (0.122 – 2.785), 0.500                |                              |
|                   | Education                 | 0.891 (0.782 – 1.015), 0.082                     | 0.857 (0.694 – 1.060), 0.155             | 0.831 (0.640 – 1.078), 0.164                |                              |
|                   | MEM                       | 0.762 (0.483 – 1.201), 0.242                     | 0.900 (0.290 – 2.790), 0.855             | 1.023 (0.298 – 3.507), 0.971                | < 5 cases                    |
|                   | A $\beta$ 42 (pg/ml)      | 0.999 (0.997 – 1.000), 0.046*                    | 0.997 (0.995 – 1.000), 0.027*            | 0.996 (0.992 – 0.999), 0.022*               |                              |
|                   | t-tau (pg/ml)             | 0.999 (0.995 – 1.002), 0.391                     | 0.996 (0.989 – 1.003), 0.265             | 0.995 (0.986 – 1.003), 0.197                |                              |
|                   | p-tau (pg/ml)             | 1.011 (0.984 – 1.039), 0.421                     | 1.032 (0.977 – 1.090), 0.264             | 1.041 (0.977 – 1.108), 0.216                |                              |

**Table S3 (Cont.).**

|                    |               | Whole sample<br>(n = 296)      | Cognitively healthy<br>(CO+SCD+REL)<br>(n = 190) | Cognitively healthy worrier<br>(n = 100) | Cognitively healthy non-<br>worrier<br>(n = 88) |
|--------------------|---------------|--------------------------------|--------------------------------------------------|------------------------------------------|-------------------------------------------------|
| Predictors         |               | OR (95% CI), p-value           | OR (95% CI), p-value                             | OR (95% CI), p-value                     | OR (95% CI), p-value                            |
| Apathy             | Age           | 1.014 (0.948 – 1.085), 0.680   | 1.199 (1.013 – 1.420), 0.035*                    | 1.253 (0.987 – 1.592), 0.064             |                                                 |
|                    | Sex           | 0.358 (0.156 – 0.823), 0.016*  | 0.088 (0.008 – 0.967), 0.047*                    | 0.104 (0.007 – 1.658), 0.109             |                                                 |
|                    | Education     | 0.896 (0.781 – 1.029), 0.119   | 0.764 (0.565 – 1.032), 0.080                     | 0.848 (0.621 – 1.158), 0.299             |                                                 |
|                    | MEM           | 0.566 (0.348 – 0.922), 0.022*  | 1.226 (0.162 – 9.256), 0.844                     | 3.771 (0.21 – 65.507), 0.362             | < 5 cases                                       |
|                    | Aβ42 (pg/ml)  | 0.999 (0.998 – 1.001), 0.203   | 0.998 (0.996 – 1.001), 0.219                     | 0.996 (0.991 – 1.001), 0.133             |                                                 |
|                    | t-tau (pg/ml) | 1.000 (0.997 – 1.003), 0.994   | 0.996 (0.987 – 1.005), 0.399                     | 0.998 (0.989 – 1.006), 0.617             |                                                 |
|                    | p-tau (pg/ml) | 1.005 (0.978 – 1.032), 0.739   | 1.046 (0.981 – 1.116), 0.171                     | 1.051 (0.983 – 1.124), 0.147             |                                                 |
| Irritability       | Age           | 1.072 (1.016 – 1.130), 0.011*  | 1.111 (1.029 – 1.119), 0.007                     | 1.170 (1.051 – 1.303), 0.004**           | 1.034 (0.880 – 1.216), 0.680                    |
|                    | Sex           | 0.384 (0.204 – 0.722), 0.003** | 0.455 (0.181 – 1.147), 0.095                     | 0.407 (0.122 – 1.362), 0.145             | 0.340 (0.060 – 1.945), 0.225                    |
|                    | Education     | 0.953 (0.859 – 1.056), 0.358   | 1.014 (0.879 – 1.169), 0.849                     | 0.983 (0.825 – 1.171), 0.848             | 0.967 (0.705 – 1.328), 0.837                    |
|                    | MEM           | 1.154 (0.766 – 1.738), 0.494   | 0.739 (0.300 – 1.817), 0.510                     | 1.183 (0.371 – 3.777), 0.776             | 0.317 (0.041 – 2.470), 0.273                    |
|                    | Aβ42 (pg/ml)  | 0.999 (0.998 – 1.000), 0.073   | 0.999 (0.997 – 1.000), 0.098                     | 0.998 (0.996 – 1.000), 0.042*            | 1.002 (0.998 – 1.006), 0.345                    |
|                    | t-tau (pg/ml) | 0.997 (0.994 – 1.000), 0.051   | 0.995 (0.989 – 1.000), 0.048*                    | 0.996 (0.989 – 1.002), 0.150             | 0.988 (0.976 – 1.002), 0.085                    |
|                    | p-tau (pg/ml) | 1.031 (1.007 – 1.055), 0.020*  | 1.038 (0.995 – 1.082), 0.081                     | 1.039 (0.992 – 1.088), 0.107             | 1.020 (0.910 – 1.143), 0.736                    |
| Sleep disturbances | Age           | 0.989 (0.937 – 1.043), 0.679   | 1.016 (0.946 – 1.090), 0.663                     | 0.982 (0.894 – 1.078), 0.699             | 1.055 (0.923 – 1.205), 0.431                    |
|                    | Sex           | 2.006 (1.091 – 3.690), 0.025*  | 3.403 (1.418 – 8.166), 0.006**                   | 3.451 (1.120 – 10.630), 0.031*           | 5.683 (1.203 – 26.842), 0.028*                  |
|                    | Education     | 0.975 (0.878 – 1.083), 0.635   | 1.010 (0.884 – 1.155), 0.879                     | 0.998 (0.844 – 1.180), 0.982             | 1.037 (0.800 – 1.343), 0.768                    |
|                    | MEM           | 0.886 (0.584 – 1.344), 0.570   | 0.515 (0.210 – 1.258), 0.145                     | 0.842 (0.303 – 2.344), 0.742             | 0.135 (0.021 – 0.864), 0.034*                   |
|                    | Aβ42 (pg/ml)  | 1.000 (0.999 – 1.001), 0.523   | 1.000 (0.998 – 1.001), 0.585                     | 0.999 (0.997 – 1.001), 0.236             | 1.002 (0.999 – 1.004), 0.183                    |
|                    | t-tau (pg/ml) | 0.998 (0.995 – 1.001), 0.294   | 0.998 (0.993 – 1.003), 0.383                     | 0.997 (0.991 – 1.004), 0.429             | 1.000 (0.992 – 1.008), 0.946                    |
|                    | p-tau (pg/ml) | 1.005 (0.979 – 1.031), 0.724   | 1.018 (0.980 – 1.056), 0.357                     | 1.022 (0.975 – 1.070), 0.367             | 0.994 (0.924 – 1.070), 0.880                    |

Note. \*  $p < .05$ , \*\*  $p < .01$ . Aβ42 beta-amyloid 42; CO healthy controls; CI Confidence Interval; MEM Memory factor score; OR Odds ratio; p-tau phospho-tau; REL first degree relatives of AD patients; SCD subjective cognitive decline; t-tau total tau
